# Supplementary material for: Clustered F8 missense mutations cause hemophilia A by combined alteration of splicing and protein biosynthesis and activity
Source: PubMed Central journal article supplement — Haematologica. 2017 Nov 23;103(2):344–50. doi: 10.3324/haematol.2017.178327 (PMC5792279; doi:10.3324/haematol.2017.178327), 2018-02
Supplement: 2017.178327.DONADON_SUPPL.pdf [file 2017.178327.DONADON_SUPPL.pdf]

## Clustered *F8* missense mutations cause hemophilia A by combined alteration of splicing and protein biosynthesis and activity

Irving Donadon,<sup>1,2</sup> John H. McVey,<sup>3</sup> Isabella Garagiola,<sup>4</sup> Alessio Branchini,<sup>1</sup> Mimosa Mortarino,<sup>4</sup> Flora Peyvandi,<sup>4,5</sup> Francesco Bernardi<sup>1</sup> and Mirko Pinotti<sup>1,6</sup>

<sup>1</sup>Department of Life Sciences and Biotechnology, University of Ferrara, Italy; <sup>2</sup>Human Molecular Genetics, International Centre for Genetic Engineering and Biotechnology, Trieste, Italy; <sup>3</sup>School of Bioscience & Medicine, University of Surrey, Guildford, UK; <sup>4</sup>Angelo Bianchi Bonomi Hemophilia and Thrombosis Center, Fondazione IRCCS Ca' Granda Ospedale Maggiore Policlinico and Fondazione Luigi Villa, Milan, Italy; <sup>5</sup>Department of Pathophysiology and Transplantation, University of Milan, Italy and <sup>6</sup>Laboratorio per le Tecnologie delle Terapie Avanzate, University of Ferrara, Italy

©2017 Ferrata Storti Foundation. This is an open-access paper. doi:10.3324/haematol.2017.178327

Received: August 10, 2017.

Accepted: November 15, 2017.

Pre-published: November 23, 2017.

Correspondence: pnm@unife.it

---

## SUPPLEMENTARY METHODS

Sequence of oligonucleotides used

|                                                   | Name                | sequence 5' -> 3'                |
|---------------------------------------------------|---------------------|----------------------------------|
| <b>Mutagenesis of FVIII(co) cDNA</b>              | rFVIII-2013R dir    | CTGCCCAGCAAGGCCCGCATCTGGCGGGTG   |
|                                                   | rFVIII-2013R rev    | CCACCCGCCAGATGCGGGCCTTGCTGGGG    |
|                                                   | rFVIII-2016W dir    | AAGGCCGGCATCTGGTGGGTGGAGTGTCTA   |
|                                                   | rFVIII-2016W rev    | TCAGACACTCCACCCACCAGATGCCGGCCT   |
|                                                   | rFVIII-2018G dir    | GCATCTGGCGGGTGGGGTGTCTGATCGGCA   |
|                                                   | rFVIII-2018G rev    | TCGCCGATCAGACACCCACCCGCCAGATC    |
|                                                   | rFVIII-2038S dir    | TTTCTGGTGTACAGCAGCAAGTGCCAGACC   |
|                                                   | rFVIII2038S rev     | GGGGTCTGGCACTTGCTGCTGTACACCAGA   |
| <b>Creation of coFVIIIΔ19 cDNA</b>                | rFVIII delta 19 dir | TGTACCCCGAGTGCCAGACCCCACTGGGCG   |
|                                                   | rFVIII delta19 rev  | GGTCTGGCACTCGGGGTACAGGTTGTACAG   |
|                                                   | rFVIII 10515 dir    | CCATCGAACCCCGGAGCTTC             |
|                                                   | rFVIII 12278 rev    | GACCTGAGGCCGCCAGGC               |
| <b>RT-PCR of transcripts from ectopic F8 mRNA</b> | FVIII ex16 dir      | GCCTGGGCTTATTTCTCTGATG           |
|                                                   | FVIII ex22 rev1     | CCTCGATAAGTCTGCCACTTCT           |
|                                                   | FVIII ex17 dir      | CCTGCTCATGGGAGACAAGT             |
|                                                   | FVIII ex22 rev2     | AACTGAGAGATGTAGAGGCT             |
| <b>PCR of the F8 minigene region</b>              | F8 int18 Ndel dir   | tacatatggagtgccacatctggccaatg    |
|                                                   | F8 int19 Ndel rev   | tacatatgtctaagttatctggaact       |
| <b>Mutagenesis of the F8 minigene</b>             | 6037g>a dir         | TTACCATCCAAAGCTAGAAATTTGGCGGGTGG |
|                                                   | 6037g>a rev         | CCACCCGCCAAATTCTAGCTTTGGATGGTAA  |
|                                                   | 6045g>c dir         | CAAAGCTGGAATTTGCCGGGTGGAATGCCT   |
|                                                   | 6045g>c rev         | AAGGCATTCCACCCGGCAAATTCCAGCTTTG  |
|                                                   | 6046c>t dir         | CAAAGCTGGAATTTGGtGGGTGGAATGCCTT  |
|                                                   | 6046c>t rev         | ATAAGGCATTCCACCCaCCAAATTCCAGCTG  |
|                                                   | 6047g>c dir         | AAGCTGGAATTTGGCCGGTGGAAATGCCTTAT |
|                                                   | 6047g>c rev         | ATAAGGCATTCCACCCGGCCAAATTCCAGCTT |

|                                             |                   |                                                      |
|---------------------------------------------|-------------------|------------------------------------------------------|
|                                             | 6049g>a dir       | GCTGGAATTTGGCGGATGGAATGCCTTATTG                      |
|                                             | 6049g>a rev       | CAATAAGGCATTCCATCCGCCAAATTCCAGC                      |
|                                             | 6053a>g dir       | GAATTTGGCGGGTGGGATGCCTTATTGGCA                       |
|                                             | 6053a>g rev       | TCGCCAATAAGGCATCCCACCCGCCAAATTC                      |
|                                             | 6104t>c dir       | GCACACTTTTTCTGGCGTACAGCAATAgta                       |
|                                             | 6104t>c rev       | tcacTATTGCTGTACGCCAGAAAAAGTGTGC                      |
|                                             | 6113a>g dir       | TTCTGGTGTACAGCAGTAgtgagtagcaatg                      |
|                                             | 6113a>g rev       | cattgctactcacTACTGCTGTACACCAGAA                      |
|                                             | 5ss HC F8ex19 dir | TCTGGTGTACAGCACAGgtaagtagcaatgtggca                  |
|                                             | 5ss HC F8ex19 rev | tgcccacattgctacttacCTGTGCTGTACACCAGA                 |
| <b>Creation of the pU1 F8ex19</b>           | U1 F8ex19 HC dir  | GATCTCATAACTCACTATGCAGGGGAGATAT                      |
|                                             | U1 F8ex19 HC rev  | GATCATGGTATCTCCCCTGCATAGTGAGTTA                      |
| <b>Creation of the pU7F8ex19</b>            | U7 F8ex19 dir     | ACAGAGGCCTTTCCGCAGCATTCCACCCACCAACAGC<br>AATTTTTGGAG |
|                                             | SP6 rev           | ATTTAGGTGACACTATAGAA                                 |
| <b>RT-PCR of transcripts from minigenes</b> | alpha 2,3         | CAACTTCAAGCTCCTAAGCCACTG                             |
|                                             | Bra2              | TGATTTAACCAACTTCTGGTGACCGGATCCTA                     |

Exonic and intronic nucleotides are reported in upper and lower cases, respectively. The *NdeI* restriction sites are underlined.
